# Supplementary material for: WSe2 few layers with enzyme mimic activity for high-sensitive and high-selective visual detection of glucose
Source: Royal Society of Chemistry journal article supplement (doi:10.1039/c7nr03179c), 2017-01-01
Supplement: c7nr03179c1.pdf [file c7nr03179c1.pdf]

## Supporting Information

**WSe<sub>2</sub> few layers with enzyme mimic activity for high-sensitive and high-selective  
visual detection to blood glucose**

T. M. Chen, X. J. Wu, J. X. Wang, G. W. Yang\*

*State Key Laboratory of Optoelectronic Materials and Technologies, Nanotechnology  
Research Center, School of Materials Science & Engineering, School of Physics, Sun  
Yat-sen University, Guangzhou 510275, Guangdong, P. R. China*

\* Corresponding author: [stsygw@mail.sysu.edu.cn](mailto:stsygw@mail.sysu.edu.cn)

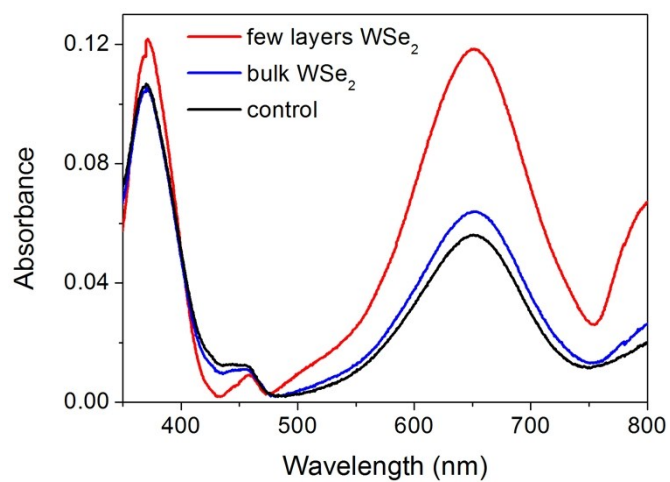

Figure S1. The peroxidase-like activity of WSe<sub>2</sub> nanosheets show thickness-dependence. Experiments were carried out using 0.1 mg few-layers or bulk WSe<sub>2</sub> in a reaction volume of 1 ml, in acetate buffer, with 0.5 mM TMB and 50 mM H<sub>2</sub>O<sub>2</sub> as substrates. Control experiment without WSe<sub>2</sub> for experiment was perform.

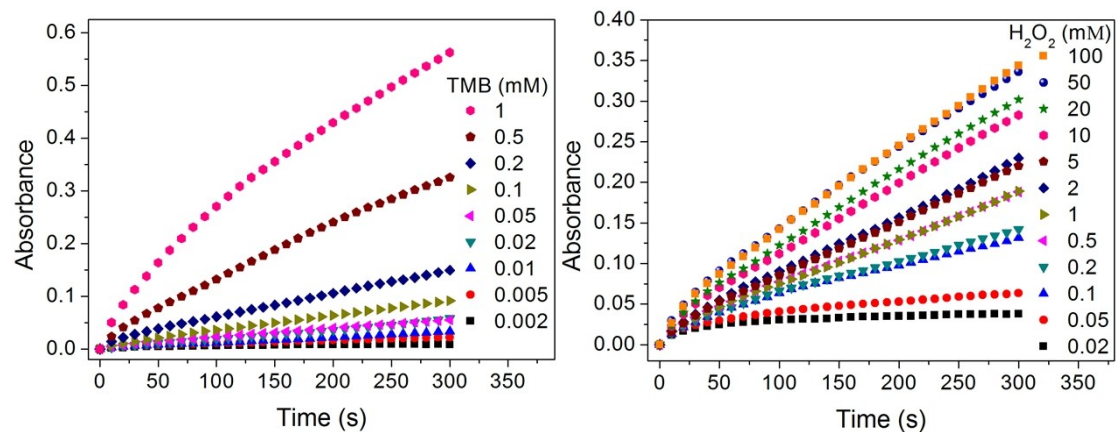

Figure S2. (a) The corresponding time dependent absorbance changes of apparent steady-state kinetic study in the presence of different concentrations of TMB. (b) The corresponding time dependent absorbance changes of apparent steady-state kinetic study in the presence of different concentrations of H<sub>2</sub>O<sub>2</sub>.

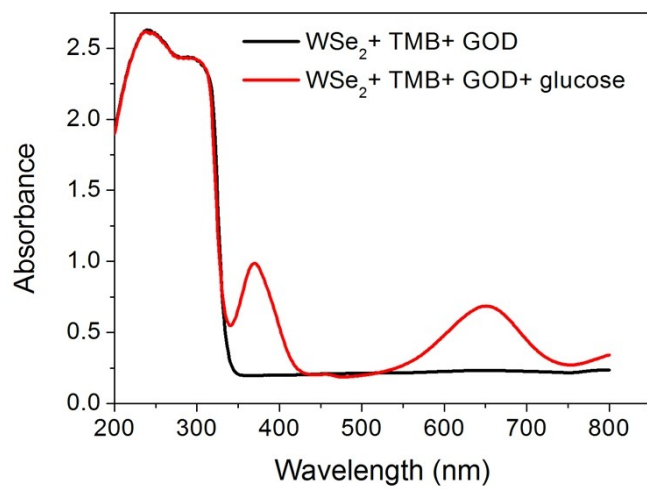

Figure S3. UV-vis absorbance spectrum of the WSe<sub>2</sub>-TMB-GOD mixed solution in the absence and in the presence of glucose.

**Table S1.** Comparison of the kinetic parameters of WSe<sub>2</sub> nanosheets and other nanozyme. K<sub>m</sub> is the Michaelis constant, V<sub>max</sub> is the maximal reaction velocity.

| Catalyst                       | Substrate                     | K <sub>m</sub> (mM) | V <sub>max</sub> (10 <sup>-8</sup> M s <sup>-1</sup> ) | References |
|--------------------------------|-------------------------------|---------------------|--------------------------------------------------------|------------|
| Fe <sub>3</sub> O <sub>4</sub> | TMB                           | 0.098               | 3.44                                                   | 18         |
|                                | H <sub>2</sub> O <sub>2</sub> | 154                 | 9.78                                                   |            |
| Graphene oxide                 | TMB                           | 0.0237              | 3.45                                                   | 25         |
|                                | H <sub>2</sub> O <sub>2</sub> | 3.99                | 3.85                                                   |            |
| MnO <sub>2</sub>               | TMB                           | 0.04                | 578                                                    | 26         |
|                                | H <sub>2</sub> O <sub>2</sub> | 0.12                | 5.71                                                   |            |
| Au                             | TMB                           | 0.00253             | 6.23                                                   | 27         |
|                                | H <sub>2</sub> O <sub>2</sub> | 25.3                | 7.21                                                   |            |
| MoS <sub>2</sub>               | TMB                           | 0.525               | 4.29                                                   | 28         |
|                                | H <sub>2</sub> O <sub>2</sub> | 0.0116              | 5.16                                                   |            |
| Fe-Co                          | TMB                           | 1.79                | 45.6                                                   | 29         |
|                                | H <sub>2</sub> O <sub>2</sub> | 0.06                | 13.2                                                   |            |
| WSe <sub>2</sub> nanosheets    | TMB                           | 0.433               | 1.43                                                   | This work  |
|                                | H <sub>2</sub> O <sub>2</sub> | 19.53               | 2.22                                                   |            |
